# Supplementary material
Source: PubMed Central journal article supplement (PMC4243345)
Supplement: ASN.2013091009_ASN2013091009SupplementaryData.pdf [file ASN.2013091009_ASN2013091009SupplementaryData.pdf]

## **Supplementary Data**

### Search Strategy:

Pubmed/Medline/Embase query

(hemodialysis) OR (haemodialysis) AND (infection) AND (catheter)

(hemodialysis) OR (haemodialysis) AND (bacteremia) OR (bacteraemia) AND (catheter)

(hemodialysis) OR (haemodialysis) AND (bacteremia) OR (bacteraemia)

Supplementary Table 1: The overall risk of bias for each study included in the meta-analysis is assessed via the Newcastle-Ottawa Quality Assessment Scale for Cohort Studies. A study can be awarded a maximum of 4 stars in the “selection” category, 2 stars in the “comparability” category and 3 stars in the “outcome category”. If no stars are awarded, it is denoted by “-”.

| <b>Study</b>                               | <b>Study Design</b>  | <b>Selection</b> | <b>Comparability</b> | <b>Outcome</b> | <b>Overall Risk of Bias</b> |
|--------------------------------------------|----------------------|------------------|----------------------|----------------|-----------------------------|
| Moss et al, 1990                           | Chart review         | ***              | -                    | ***            | Moderate                    |
| Swartz et al, 1994                         | Prospective cohort   | ***              | *                    | ***            | Low                         |
| Lund et al, 1996                           | Chart review         | ***              | -                    | **             | Moderate                    |
| Marr et al, 1997                           | Prospective cohort   | ****             | **                   | ***            | Low                         |
| Saad TF, 1999                              | Prospective cohort   | ****             | *                    | ***            | Low                         |
| Chawla et al, 2000                         | Chart review         | ***              | -                    | ***            | Moderate                    |
| Jean et al, 2002                           | Prospective cohort   | ****             | **                   | ***            | Low                         |
| Lee et al, 2005                            | Prospective cohort   | ****             | -                    | **             | Moderate                    |
| Mokrzycki et al, 2006                      | Prospective cohort   | ****             | **                   | ***            | Low                         |
| Troidle et al, 2008                        | Prospective cohort   | ****             | -                    | ***            | Moderate                    |
| Ashby et al, 2009                          | Prospective cohort   | ****             | *                    | ***            | Low                         |
| Onder et al, 2012 (1/97-12/98)             | Chart review         | ***              | -                    | **             | Moderate                    |
| *Onder et al, 2012,2008, 2007 (1/99-12/03) | Chart review         | ***              | -                    | **             | Moderate                    |
| Capdevila et al, 1993                      | Prospective cohort   | ***              | -                    | ***            | Moderate                    |
| Bailey et al, 2002                         | Prospective cohort   | ***              | -                    | ***            | Moderate                    |
| Krishnasami et al, 2002                    | Prospective cohort   | ***              | **                   | ***            | Low                         |
| Vardhan et al, 2002                        | Observational cohort | ***              | -                    | ***            | Moderate                    |
| Poole et al, 2004                          | Prospective          | ***              | **                   | ***            | Low                         |
| Lee et al, 2005                            | Prospective cohort   | ****             | -                    | **             | Moderate                    |
| Maya et al, 2007                           | Retrospective        | ***              | -                    | ***            | Moderate                    |
| Peterson et al, 2009                       | Retrospective        | ***              | -                    | ***            | Moderate                    |

|                                      |                                 |      |    |     |          |
|--------------------------------------|---------------------------------|------|----|-----|----------|
| *Onder et al, 2012, 2010 (1/04-6/06) | Chart review                    | **** | -  | **  | Moderate |
| Joshi et al, 2012                    | Prospective cohort              | ***  | -  | *** | Moderate |
| Shaffer et al, 1995                  | Observational                   | ***  | -  | *** | Moderate |
| Robinson et al, 1998                 | Prospective observational study | ***  | -  | *** | Moderate |
| Saad TF, 1999                        | Prospective cohort              | **** | *  | *** | Low      |
| Beathard, 1999                       | Prospective cohort              | **** |    | *** | Moderate |
| Tanriover et al, 2000                |                                 | **** | ** | *** | Low      |
| Mokrzycki et al, 2006                | Prospective cohort              | **** | ** | *** | Low      |
| Troidle et al, 2008                  | Prospective cohort              | **** | -  | *** | Moderate |
| Langer et al, 2011                   | Retrospective chart review      | **** | *  | *** | Low      |

Supplementary Table 2. Microbiological details from individual studies for each treatment group. We only collected details for three main organism categories – coagulase negative staphylococci (CNS), *Staphylococcus aureus* (*S. aureus*), and gram negative rods (GNR). Organisms that do not fall into one of these three categories were classified as “other” and not listed here for the sake of simplicity.

| Study                                      | No. of CRB cases | CNS (n)    | CNS cure (n) | <i>S. aureus</i> (n) | <i>S. aureus</i> cure (n) | GNR (n)    | GNR cure (n) |
|--------------------------------------------|------------------|------------|--------------|----------------------|---------------------------|------------|--------------|
| <b>SYSTEMIC ANTIBIOTICS ALONE</b>          |                  |            |              |                      |                           |            |              |
| Moss et al, 1990                           | 16               |            |              |                      |                           |            |              |
| Swartz et al, 1994                         | 29               | 7          | 3            | 13                   | 6                         | 8          | 0            |
| Lund et al, 1996                           | 22               |            |              |                      |                           |            |              |
| Marr et al, 1997                           | 38               | 9          |              | 27                   |                           | 15         |              |
| Saad TF, 1999                              | 25               |            |              | 6                    | 4                         | 7          | 3            |
| Chawla et al, 2000                         | 18               | 7          | 3            | 6                    | 1                         | 2          | 1            |
| Jean et al, 2002                           | 56               | 11         |              | 31                   |                           | 12         |              |
| Lee et al, 2005                            | 11               |            |              |                      |                           | 2          | 2            |
| Mokrzycki et al, 2006                      | 49               |            |              | 15                   | 7                         | 5          | 4            |
| Troidle et al, 2008                        | 35               | 17         | 13           | 2                    | 1                         | 12         | 6            |
| Ashby et al, 2009                          | 115              |            |              | 18                   | 11                        | 33         | 21           |
| Onder et al, 2012 (1/97-12/98)             | 95               | 36         |              | 10                   |                           | 14         |              |
| *Onder et al, 2012,2008, 2007 (1/99-12/03) | 188              | 67         |              | 14                   |                           | 26         |              |
| <b>Total</b>                               | <b>697</b>       | <b>154</b> |              | <b>142</b>           |                           | <b>136</b> |              |
| <b>ANTIBIOTIC LOCK SOLUTION</b>            |                  |            |              |                      |                           |            |              |
| Capdevila et al, 1993                      | 11**             | 5          | 5            | 2                    | 2                         | 3          | 1            |
| Bailey et al, 2002                         | 10               | 2          | 2            | 0                    | 0                         | 5          | 1            |
| Krishnasami et al, 2002                    | 62               | 25         | 19           | 2                    | 0                         | 34         | 20           |
| Vardhan et al, 2002                        | 26               | 8          | 6            | 11                   | 6                         | 2          | 2            |
| Poole et al, 2004                          | 47               | 16         | 12           | 10                   | 4                         | 15         | 13           |
| Lee et al, 2005                            | 18               |            |              |                      |                           | 7          | 7            |
| Maya et al, 2007                           | 113              |            |              | 113                  | 46                        |            |              |
| Peterson et al, 2009                       | 64               |            |              |                      |                           |            |              |
| *Onder et al, 2012, 2010 (1/04-6/06)       | 149              | 60         |              | 16                   |                           | 40         |              |
| Joshi et al,                               | 46               | 4          | 3            | 7                    | 2                         | 22         | 14           |

|                       |            |            |   |            |   |            |    |
|-----------------------|------------|------------|---|------------|---|------------|----|
| 2012                  |            |            |   |            |   |            |    |
| <i>Total</i>          | <i>546</i> | <i>120</i> |   | <i>161</i> |   | <i>128</i> |    |
| GUIDEWIRE EXCHANGE    |            |            |   |            |   |            |    |
| Shaffer et al, 1995   | 12         | 7          | 6 | 1          | 1 | 2          | 1  |
| Robinson et al, 1998  | 23         | 3          | 2 | 8          | 7 | 2          | 2  |
| Saad TF, 1999         | 43         |            |   | 6          | 4 | 13         | 13 |
| Beathard, 1999        | 77         |            |   |            |   |            |    |
| Tanriover et al, 2000 | 31         |            |   |            |   |            |    |
| Mokrzycki et al, 2006 | 35         |            |   | 7          | 7 | 13         | 13 |
| Troidle et al, 2008   | 36         | 9          | 6 | 4          | 1 | 11         | 7  |
| Langer et al, 2011    | 96         | 31         |   | 30         |   |            |    |
| <i>Total</i>          | <i>353</i> | <i>50</i>  |   | <i>56</i>  |   | <i>41</i>  |    |

Supplementary Table 3. MOOSE Checklist:

| <b>Reporting of background should include:</b>                                                                                                                               | <b>Relevant page of manuscript</b> |
|------------------------------------------------------------------------------------------------------------------------------------------------------------------------------|------------------------------------|
| Problem definition                                                                                                                                                           | Page 4, last paragraph             |
| Hypothesis statement                                                                                                                                                         | Page 4, last paragraph             |
| Description of study outcomes                                                                                                                                                | Page 4, last paragraph             |
| Type of exposure or intervention used                                                                                                                                        | Page 4, last paragraph             |
| Type of study designs used                                                                                                                                                   | Page 4, last paragraph             |
| Study population                                                                                                                                                             | Page 4, last paragraph             |
| <b>Reporting of search strategy should include:</b>                                                                                                                          |                                    |
| Qualifications of searchers (eg librarians and investigators)                                                                                                                | Page 13, second paragraph          |
| Search strategy, including time period included in the synthesis and keywords                                                                                                | Page 13, first paragraph           |
| Effort to include all available studies, including contact with authors                                                                                                      | Page 13, first paragraph           |
| Databases and registries searched                                                                                                                                            | Page 13, first paragraph           |
| Search software used, name and version, including special features used (e.g., explosion)                                                                                    | No search software used            |
| Use of hand searching (e.g., reference lists of obtained articles)                                                                                                           | Page 13, first paragraph           |
| List of citations located and those excluded, including justification                                                                                                        | Figure 1                           |
| Method of addressing articles published in languages other than English                                                                                                      | Page 13, first paragraph           |
| Method of handling abstracts and unpublished studies                                                                                                                         | Page 13, second paragraph          |
| Description of any contact with authors                                                                                                                                      | Page 13, first paragraph           |
| <b>Reporting of methods should include:</b>                                                                                                                                  |                                    |
| Description of relevance or appropriateness of studies assembled for assessing the hypothesis to be tested                                                                   | Page 13, second paragraph          |
| Rationale for the selection and coding of data (e.g., sound clinical principles or convenience)                                                                              | Page 13, last paragraph            |
| Documentation of how data were classified and coded (e.g., multiple raters, blinding, and inter-rater reliability)                                                           | Page 14                            |
| Assessment of confounding (e.g., comparability of cases and controls in studies where appropriate)                                                                           | N/A                                |
| Assessment of study quality, including blinding of quality assessors; stratification or regression on possible predictors of study results                                   | Page 14                            |
| Assessment of heterogeneity                                                                                                                                                  | Page 14                            |
| Description of statistical methods (e.g., complete description of fixed or random effects models)                                                                            | Pages 15-17                        |
| Justification of whether the chosen models account for predictors of study results, dose-response models, or cumulative meta-analysis) in sufficient detail to be replicated | Pages 15-16                        |
| Provision of appropriate tables and graphics                                                                                                                                 | Supplementary Table 1, Appendix 1  |

---

**Reporting of results should include:**

---

|                                                                                    |                                                                 |
|------------------------------------------------------------------------------------|-----------------------------------------------------------------|
| Graphical summary of individual study estimates and the overall estimate of effect | Figure 3                                                        |
| A table giving descriptive information for each study included                     | Table 1                                                         |
| Results of sensitivity testing (e.g., subgroup analysis)                           | Pages 7-9                                                       |
| Indication of statistical uncertainty of findings                                  | 95% confidence intervals were reported with all point estimates |

---

**Reporting of discussion should include:**

---

|                                                                                                                              |            |
|------------------------------------------------------------------------------------------------------------------------------|------------|
| Quantitative assessment of bias (e.g., publication bias)                                                                     | Page 11    |
| Justification for exclusion (e.g., exclusion of non-English-language citations)                                              | N/A        |
| Assessment of quality of included studies                                                                                    | Page 11    |
| The discussion should also include discussion of issues related to bias including publication bias, confounding, and quality | Page 11-12 |

---

**Reporting of conclusions should include:**

---

|                                                                               |         |
|-------------------------------------------------------------------------------|---------|
| Consideration of alternative explanations for observed results                | N/A     |
| Generalizability of the conclusions (i.e., appropriate to the data presented) | Page 12 |
| Guidelines for future research                                                | Page 12 |
| Disclosure of funding source                                                  | Page 18 |

---

## Appendix 1: NEWCASTLE - OTTAWA QUALITY ASSESSMENT SCALE COHORT STUDIES

Note: A study can be awarded a maximum of one star for each numbered item within the Selection and Outcome categories. A maximum of two stars can be given for Comparability.

### **Selection**

#### 1) Representativeness of the exposed cohort

- a) truly representative of the average hemodialysis patient with bacteremia in the community \*
- b) somewhat representative of the average hemodialysis patient with bacteremia in the community \*
- c) selected group of users eg nurses, volunteers
- d) no description of the derivation of the cohort

#### 2) Selection of the non-exposed cohort

- a) drawn from the same community as the exposed cohort \*
- b) drawn from a different source
- c) no description of the derivation of the non-exposed cohort

#### 3) Ascertainment of exposure

- a) secure record (eg surgical records) \*
- b) structured interview \*
- c) written self report
- d) no description

#### 4) Demonstration that outcome of interest was not present at start of study

- a) yes \*
- b) no

### **Comparability**

#### 1) Comparability of cohorts on the basis of the design or analysis

- a) study controls for follow-up time \*
- b) study controls for any additional factor \* (multivariate analysis, pathogen)

### **Outcome**

#### 1) Assessment of outcome

- a) independent blind assessment \*
- b) record linkage \*
- c) self report
- d) no description

#### 2) Was follow-up long enough for outcomes to occur

- a) yes \*
- b) no

#### 3) Adequacy of follow up of cohorts

- a) complete follow up - all subjects accounted for \*
- b) subjects lost to follow up unlikely to introduce bias - small number lost - > 85% follow up, or description provided of those lost \*
- c) follow up rate < 85% and no description of those lost
- d) no statement
